# Supplementary material for: Automated identification and quantification of microfibres and microplastics
Source: Royal Society of Chemistry journal article supplement (doi:10.1039/c9ay00126c), 2019-01-01
Supplement: c9ay00126c1.xlsx [file c9ay00126c1.xlsx]

## Sheet: Tabelle1
ID	Minimum Pixel Threshold	Distance Factor	Dilation factor	Filament Range Factor	Elongation Threshold Factor	Additional Info
1	5	3	3	8	3	Reference
2	0	3	3	8	3	Pixel Test
3	1	3	3	8	3	Pixel Test
4	2	3	3	8	3	Pixel Test
5	3	3	3	8	3	Pixel Test
6	4	3	3	8	3	Pixel Test
7	6	3	3	8	3	Pixel Test
8	7	3	3	8	3	Pixel Test
9	8	3	3	8	3	Pixel Test
10	9	3	3	8	3	Pixel Test
11	10	3	3	8	3	Pixel Test
12	5	1	3	8	3	Distance Test
13	5	2	3	8	3	Distance Test
14	5	4	3	8	3	Distance Test
15	5	5	3	8	3	Distance Test
16	5	3	1	8	3	Dilution Test
17	5	3	2	8	3	Dilution Test
18	5	3	4	8	3	Dilution Test
19	5	3	5	8	3	Dilution Test
20	5	3	3	3	3	Filament Range Test
21	5	3	3	4	3	Filament Range Test
22	5	3	3	5	3	Filament Range Test
23	5	3	3	6	3	Filament Range Test
24	5	3	3	7	3	Filament Range Test
25	5	3	3	9	3	Filament Range Test
26	5	3	3	10	3	Filament Range Test
27	5	3	3	11	3	Filament Range Test
28	5	3	3	12	3	Filament Range Test
29	5	3	3	13	3	Filament Range Test
30	5	3	3	14	3	Filament Range Test
31	5	3	3	15	3	Filament Range Test
32	5	3	3	16	3	Filament Range Test
33	5	3	3	8	1	Elongation Test
34	5	3	3	8	2	Elongation Test
35	5	3	3	8	4	Elongation Test
36	5	3	3	8	5	Elongation Test
37	5	3	3	8	6	Elongation Test
38	5	3	3	8	7	Elongation Test
39	5	3	3	8	8	Elongation Test
40	5	4	1	8	3	Distancc4/Dilution
41	5	4	2	8	3	Distancc4/Dilution
42	5	4	4	8	3	Distancc4/Dilution
43	5	4	5	8	3	Distancc4/Dilution
44	0	4	4	8	3	Pixel Dis4 dil4
45	1	4	4	8	3	Pixel Dis4 dil4
46	2	4	4	8	3	Pixel Dis4 dil4
47	3	4	4	8	3	Pixel Dis4 dil4
48	4	4	4	8	3	Pixel Dis4 dil4
49	2	4	4	8	4	P2Dis4Dil4Elongation
50	2	4	4	8	5	P2Dis4Dil4Elongation
51	2	4	4	8	6	P2Dis4Dil4Elongation
52	2	4	4	8	7	P2Dis4Dil4Elongation
53	2	4	4	8	8	P2Dis4Dil4Elongation
54	6	4	4	8	3	Pixel Dis4 dil4
55	7	4	4	8	3	Pixel Dis4 dil4
56	8	4	4	8	3	Pixel Dis4 dil4
57	9	4	4	8	3	Pixel Dis4 dil4
58	10	4	4	8	3	Pixel Dis4 dil4
59	2	4	4	8	1	P2Dis4Dil4Elongation
60	2	4	4	8	2	P2Dis4Dil4Elongation
61	2	4	4	3	3	P2Dis4Dil4Filament
62	2	4	4	4	3	P2Dis4Dil4Filament
63	2	4	4	5	3	P2Dis4Dil4Filament
64	2	4	4	6	3	P2Dis4Dil4Filament
65	2	4	4	7	3	P2Dis4Dil4Filament
66	2	4	4	9	3	P2Dis4Dil4Filament
67	2	4	4	10	3	P2Dis4Dil4Filament
68	2	4	4	11	3	P2Dis4Dil4Filament
69	2	4	4	12	3	P2Dis4Dil4Filament
70	2	4	4	13	3	P2Dis4Dil4Filament
71	2	4	4	14	3	P2Dis4Dil4Filament
72	2	4	4	15	3	P2Dis4Dil4Filament
73	2	4	4	16	3	P2Dis4Dil4Filament
74	2	2	2	8	3	P2Dis2Dil2
75	2	5	5	8	3	P2Dis5Dil5
76	2	6	6	8	3	P2Dis6Dil6
77	5	4	4	1	3	P5Dis4Dil4Elongation
78	5	4	4	2	3	P5Dis4Dil4Elongation
79	5	4	4	4	3	P5Dis4Dil4Elongation
80	5	4	4	5	3	P5Dis4Dil4Elongation
81	5	4	4	6	3	P5Dis4Dil4Elongation
82	5	4	4	7	3	P5Dis4Dil4Elongation
83	5	4	4	8	3	P5Dis4Dil4Elongation

## Sheet: ML-Data
Particles (MPAPP + Coverglass)
Sample station	Treated Waster Water sampled	Volume after digestion	Volume for FTIR [mL]	Proportion	polyethylene	polyethylene oxidized	polyethylene-chlorinated	polyproplyene	polystryene	polycarbonate	polyamide	polyvinylchloride	cellulose chemical modified	nitrile rubber	polyester	acrylates/polyurethanes/varnish/lacquer	animal fur	plant fibres	sand	polysulfone	polyetheretherketone	polychloroprene	chitin	polyisoprene chlorinated	polylactide acide	polycaprolactone	ethylene-vinyl-acetate	polyimide	polyoxymethylene	polybutadiene	acrylonitrile-butadiene	rubber type 1	rubber type 2	charcoal	coal	rubber type 3	polyethylene	polyethylene oxidized	polyethylene-chlorinated	polyproplyene	polystryene	polycarbonate	polyamide	polyvinylchloride	cellulose chemical modified	nitrile rubber	polyester	acrylates/polyurethanes/varnish/lacquer	animal fur
Blank corrected	[L]	[mL]	[mL]		[N]	[N]	[N]	[N]	[N]	[N]	[N]	[N]	[N]	[N]	[N]	[N]	[N]	[N]	[N]	[N]	[N]	[N]	[N]	[N]	[N]	[N]	[N]	[N]	[N]	[N]	[N]	[N]	[N]	[N]	[N]	[N]	[N/L]	[N/L]	[N/L]	[N/L]	[N/L]	[N/L]	[N/L]	[N/L]	[N/L]	[N/L]	[N/L]	[N/L]	[N/L]
Holdorf_13082015	500	97.6	10	0.102459	14.5902	0	5	40.5902	0	0	3.28279	0	0	0	2.4877	18.8975	0	1373.69	165.488	0	0	0	14.5902	0	0	0	0	0	0	0	0	0	0	1655	40.8975	14.9754	0.2848	0	0.0976	0.79232	0	0	0.06408	0	0	0	0.04856	0.36888	0
Holdorf_17082015	500	49.6	6	0.120968	182.516	1	36	212.516	4	0	77.1532	2	6	2	68.0323	567.879	1071.52	2027.84	721.395	0	0	1	17.5161	0	3	0	39	0	5	0	0	7	0	0	0	160.79	3.0176	0.0165333	0.5952	3.5136	0.0661333	0	1.2756	0.0330667	0.0992	0.0330667	1.1248	9.38893	17.7159
Oldenburg_VNF_13082015	501	47	20	0.425532	159	3.29787	23	192	1.29787	2	17	0	18	0	28	403.596	316.574	2746.72	241.489	0	0	57	915	0	0	0	199.149	0	1	0	0	5	0	1	1	123.574	0.745808	0.0154691	0.107884	0.900599	0.00608782	0.00938124	0.0797405	0	0.0844311	0	0.131337	1.89311	1.48493
Oldenburg_NF_13082015	531	41.1	5	0.121655	1	0	0	8	0	0	1	0.635036	0	1	1	0.635036	172.878	319.328	2.89051	0	0	0	7	0	0	0	0.756691	0	0	0	0	0	0	0	2	0.878345	0.0154802	0	0	0.123842	0	0	0.0154802	0.00983051	0	0.0154802	0.0154802	0.00983051	2.6762
Oldenburg_VVF_17082015	185.3	44.5	18	0.404494	264	29.382	22	366	0	2	33	0	5	1	27	987.764	237.596	2048.72	107.483	0	0	5	29	0	0	0	487.191	0	0	0	0	34	0	0	0	236.596	3.52222	0.392007	0.293518	4.88307	0	0.0266835	0.440277	0	0.0667086	0.0133417	0.360227	13.1785	3.16993
Oldenburg_NVF_17082015	500.1	41.8	25	0.598086	47	19.6077	6	113	2	3	21	12.8134	18	2	54	1727.22	451.402	1952.55	530.598	0.401914	0	26	173	0	0	0	129.804	0	2	0	0	14	0	0	0	122.402	0.157137	0.0655549	0.02006	0.377796	0.00668666	0.01003	0.07021	0.0428394	0.06018	0.00668666	0.18054	5.77465	1.50919
Fibers (MPAPP + Coverglass)
Sample station	Treated Waster Water sampled	Volume after digestion	Volume for FTIR [mL]	Proportion	polyethylene	polyethylene oxidized	polyethylene-chlorinated	polyproplyene	polystryene	polycarbonate	polyamide	polyvinylchloride	cellulose chemical modified	nitrile rubber	polyester	acrylates/polyurethanes/varnish/lacquer	animal fur	plant fibres	sand	polysulfone	polyetheretherketon	polychloroprene	chitin	polyisoprene chlorinated	polylactide acide	polycaprolactone	ethylene-vinyl-acetate	polyimide	polyoxymethylene	polybutadiene	acrylonitrile-butadiene	rubber type 1	rubber type 2	charcoal	coal	rubber type 3	polyethylene	polyethylene oxidized	polyethylene-chlorinated	polyproplyene	polystryene	polycarbonate	polyamide	polyvinylchloride	cellulose chemical modified	nitrile rubber	polyester	acrylates/polyurethanes/varnish/lacquer	animal fur
Blank corrected	[L]	[mL]	[mL]		[N]	[N]	[N]	[N]	[N]	[N]	[N]	[N]	[N]	[N]	[N]	[N]	[N]	[N]	[N]	[N]	[N]	[N]	[N]	[N]	[N]	[N]	[N]	[N]	[N]	[N]	[N]	[N]	[N]	[N]	[N]	[N]	[N/L]	[N/L]	[N/L]	[N/L]	[N/L]	[N/L]	[N/L]	[N/L]	[N/L]	[N/L]	[N/L]	[N/L]	[N/L]
Holdorf_13082015	500	97.6	10	0.102459	5	0	0	7.89754	0	0	0.795082	0	0	0	0	4	0	282.086	11	0	0	0	2	0	1	0	1	0	0	0	0	0	0	252	0	4.89754	0.0976	0	0	0.15416	0	0	0.01552	0	0	0	0	0.07808	0
Holdorf_17082015	500	49.6	6	0.120968	22	0	3	41.879	1	0	10.7581	0	0	0	20.879	87	159.855	481.234	59	0	0	0	2	0	0	0	3	0	0	0	0	1	0	0	0	25.879	0.363733	0	0.0496	0.6924	0.0165333	0	0.177867	0	0	0	0.3452	1.4384	2.64293
Oldenburg_VNF_13082015	501	47	20	0.425532	24	0	1	34	0	0	2	0	1	0	1	50.5745	26	563.936	8.3617	1	0	4	145	0	0	0	24	0	0	0	0	0	0	0	0	13	0.112575	0	0.00469062	0.159481	0	0	0.00938124	0	0.00469062	0	0.00469062	0.237226	0.121956
Oldenburg_NF_13082015	531	41.1	5	0.121655	0	0	0	2	0	0	0	0	0	0	0	1	35	29.837	0	0	0	0	0	0	0	0	0	0	0	0	0	0	0	0	0	0	0	0	0	0.0309605	0	0	0	0	0	0	0	0.0154802	0.541808
Oldenburg_VVF_17082015	185.3	44.5	18	0.404494	31	3	2	63	0.595506	0	4	0	3	0	3	154.596	20	508.483	0.88764	0	0	1	5	0	0	0	64	0	0	0	0	6	0	0	0	23	0.413594	0.0400252	0.0266835	0.840529	0.00794507	0	0.0533669	0	0.0400252	0	0.0400252	2.06257	0.266835
Oldenburg_NVF_17082015	500.1	41.8	25	0.598086	8	1	1	31	0	0	2	1	7	0	6	107.402	14	526.45	53.4785	0	0	3	27	0	0	0	15	0	0	0	0	1	0	0	0	34	0.0267467	0.00334333	0.00334333	0.103643	0	0	0.00668666	0.00334333	0.0234033	0	0.02006	0.35908	0.0468066
[truncated: 19 more columns]
